# Supplementary material for: Apoptosis signal-regulating kinase 1 exhibits oncogenic activity in pancreatic cancer
Source: PubMed Central journal article supplement (PMC5342730; doi:10.18632/oncotarget.12090), 2016-09-17
Supplement: oncotarget-07-75155-s001.pdf [file oncotarget-07-75155-s001.pdf]

# Apoptosis signal-regulating kinase 1 exhibits oncogenic activity in pancreatic cancer

## SUPPLEMENTARY FIGURES

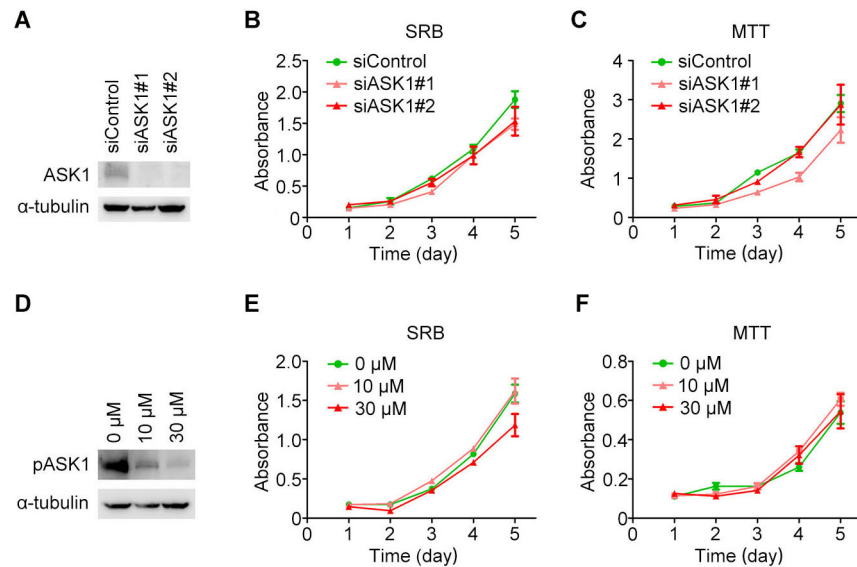

**Supplementary Figure S1: Effects of ASK1 on the proliferation of normal pancreatic epithelial cells.** **A.** Western blot analysis of ASK1 and  $\alpha$ -tubulin expression in normal pancreatic epithelial cells transfected with control or ASK1-targeted siRNAs. **B, C.** Normal pancreatic epithelial cells were transfected with control or ASK1-targeted siRNAs, and cell proliferation was examined by SRB (B) and MTT (C) assays. **D.** Western blot analysis of ASK1 and  $\alpha$ -tubulin expression in normal pancreatic epithelial cells treated with the indicated doses of NQDI-1. **E, F.** Normal pancreatic epithelial cells were treated with NQDI-1, and cell proliferation was examined by SRB (E) and MTT (F) assays.

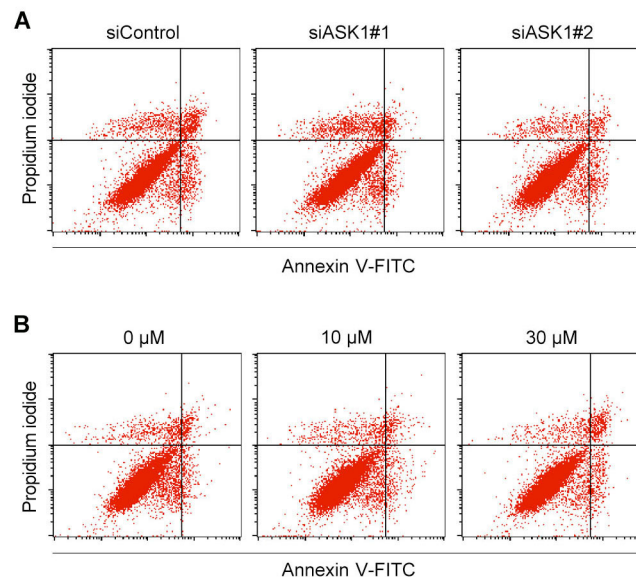

**Supplementary Figure S2: Effects of ASK1 on apoptosis of pancreatic cancer cells.** **A.** PANC1 cells were transfected with control or ASK1-targeted siRNAs, and the percentage of apoptotic cells was examined by staining with annexin V-FITC and propidium iodide followed by flow cytometry. **B.** PANC1 cells were treated with the indicated doses of NQDI-1, and the percentage of apoptotic cells was examined by staining with annexin V-FITC and propidium iodide followed by flow cytometry.

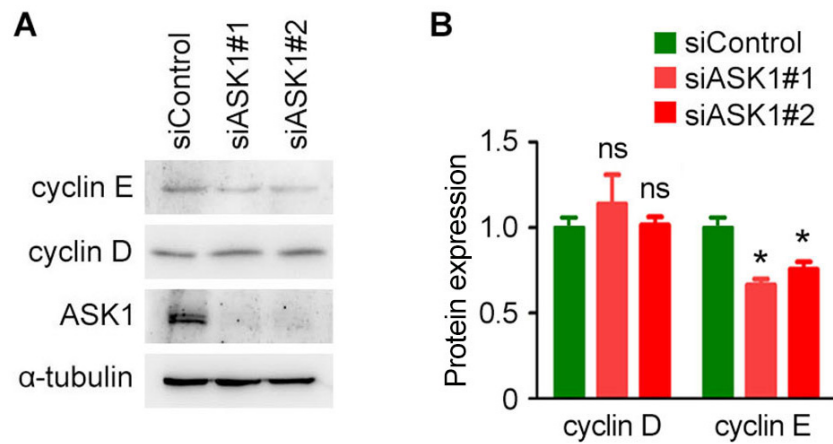

**Supplementary Figure S3: Effects of ASK1 on the expression of cyclin D and cyclin E in pancreatic cancer cells.**

**A.** Western blot analysis of the indicated proteins in PANC1 cells transfected with control or ASK1-targeted siRNAs. **B.** Experiments were performed as in (A), and the expression of cyclin D and cyclin E was quantified. \* $p < 0.05$ ; ns, not significant.
